# Supplementary material for: Eco-Evolutionary Trophic Dynamics: Loss of Top Predators Drives Trophic Evolution and Ecology of Prey
Source: PubMed Central journal article supplement (PMC3079755; doi:10.1371/journal.pone.0018879), 2011-04-19
Supplement: pone.0018879.s001.pdf [file pone.0018879.s001.pdf]

**Appendix S1.** Sampling locations in the Aripo River drainage of Trinidad. GPS coordinates and previous site names (from [30,31]) are given.

| Site | Latitude  | Longitude | Previous Description             |
|------|-----------|-----------|----------------------------------|
| HP   | 10.66568N | 61.22789W | Aripo 6 (source of introduction) |
| LP   | 10.69048N | 61.23689W | Aripo 1                          |
| GI   | 10.67111N | 61.23203W | Aripo I                          |
